# Supplementary material for: 14-3-3 protein augments the protein stability of phosphorylated spastin and promotes the recovery of spinal cord injury through its agonist intervention
Source: eLife. 2024 Jan 17;12:RP90184. doi: 10.7554/eLife.90184 (PMC10945579; doi:10.7554/eLife.90184)
Supplement: Figure 1—source data 1. [file elife-90184-fig1-data1.xlsx]

## Sheet: GST
Sequence
DAGTIAGLNVLR
FEELNADLFR
HWPFMVVNDAGRPK
IINEPTAAAIAYGLDK
IINEPTAAAIAYGLDKK
LDKSQIHDIVLVGGSTR
LLQDFFNGKELNK
MKEIAEAYLGK
MVNHFIAEFK
NQVAMNPTNTVFDAK
RFDDAVVQSDMK
SFYPEEVSSMVLTK
SQIHDIVLVGGSTR
TTPSYVAFTDTER
TVTNAVVTVPAYFNDSQR
NSLESYAFNMK
VQVEYKGETK
LLQDFFNGK
LSKEDIER
FELTGIPPAPR
AILVDLEPGTMDSVR
ALTVPELTQQMFDSK
EIVHIQAGQCGNQIGAK
EVDEQMLNVQNK
FPGQLNADLR
GHYTEGAELVDSVLDVVR
GHYTEGAELVDSVLDVVRK
INVYYNEATGNK
INVYYNEATGNKYVPR
KLAVNMVPFPR
LAVNMVPFPR
LHFFMPGFAPLTSR
MSATFIGNSTAIQELFK
NSSYFVEWIPNNVK
IREEYPDR
IMNTFSVMPSPK
SLGGGTGSGMGTLLISK
STAIQELFK
DLYANTVLSGGTTMYPGIADR
DSYVGDEAQSKR
IWHHTFYNELR
KDLYANTVLSGGTTMYPGIADR
QEYDESGPSIVHR
SYELPDGQVITIGNER
VAPEEHPVLLTEAPLNPK
VAPEEHPVLLTEAPLNPKANR
YPIEHGIVTNWDDMEK
TTGIVMDSGDGVTHTVPIYEGYALPHAILR
VAPEEHPVLLTEAPLN
AVFPSIVGRPR
AVFPSIVGR
GTVVYGEPITASLGTDGSHYWSK
ISVGSDADLVIWDPDSVK
IVLEDGTLHVTEGSGR
KPFPDFVYK
MDENQFVAVTSTNAAK
MVIPGGIDVHTR
NLHQSGFSLSGAQIDDNIPR
QIGENLIVPGGVK
DNFTLIPEGTNGTEER
VFNLYPR
MSVIWDK
AVFVDLEPTVIDEVR
DVNAAIATIK
IHFPLATYAPVISAEK
LDHKFDLMYAK
QLFHPEQLITGK
QLFHPEQLITGKEDAANNYAR
TIGGGDDSFNTFFSETGAGK
VGINYQPPTVVPGGDLAK
EDAANNYAR
EIIDLVLDR
DVNAAIATIKTK
NLDIERPTYTNLNR
GHYTIGK
FDLMYAK
DLAKVQRAVCMLSNTTAIAEAWAR
VCMLSNTTAIAEAWAR
ALPGHLKPFETLLSQNQGGK
EAALVDMVNDGVEDLR
FEDGDLTLYQSNAILR
LKPFETLLSQNQGGK
MLLADQGQSWKEEVVTIDVWLQGSLK
PPYTIVYFPVR
STCLYGQLPK
YGTLIYTNYENGKDDYVK
MLLADQGQSWK
AFLSSPDHLNRPINGNGK
FLPRPLFTK
ITFVDFIAYDVLER
LGLDFPNLPYLIDGSHK
LKPGYLEQLPGMMR
LLLEYTDSSYEEKR
PMTLGYWDIR
VDILENQLMDNR
YTMGDAPDFDR
MAIWGSK
LYSEFLGK
TQSNAILR
FLSQPFQVAEVFTGHMGK
FTQAGSEVSALLGR
IMNVIGEPIDER
IPSAVGYQPTLATDMGTMQER
LVLEVAQHLGESTVR
PAPATTFAHLDATTVLSR
VALVYGQMNEPPGAR
VLDSGAPIKIPVGPETLGR
IGLFGGAGVGK
LISWYDNEYGYSNR
RVIISAPSADAPMFVMGVNHEK
VIHDNFGIVEGLMTTVHAITATQK
VIISAPSADAPMFVMGVNHEK
VVDLMAYMASK
VVDLMAYMASKE
LVNNGKPITIFQERDPANIK
INVLEGDEQFINAAK
LGEHNINVLEGDEQ
LGEHNINVLEGDEQF
LGEHNINVLEGDEQFINA
LGEHNINVLEGDEQFINAAK
LGEHNINVLEGDEQFIN
LGEHNINVLEGDEQFINAA
LGEHNINVLEGD
TLNNDIMLIK
LGEHNINVLEGDEQFINAAKIIKHPN
LGEHNINVL
LGEHNINVLEGDEQFINAAKII
AALAGGTTMIIDHVVPEPGSSLLTSFEK
GMYDGPVYEVPATPK
IVFEDGNISVSK
NLHQSNFSLSGAQIDDNNPR
SAADIIALAR
MVIPGGIDVNTYLQKPSQGMTSADDFFQGTR
IFNLYPR
EAYPGDVFYLHSR
NVQAEEMVEFSSGLK
TGAIVDVPVGDELLGR
TSIAIDTIINQK
AVDSLVPIGR
VLSIGDGIAR
AALAGGTTMIIDHVVPEPESSLTEAYEK
GMTTVDDFFQGTK
IMLEDGNLHVTQGAGR
NLHQSGFSLSGTQVDEGVR
MVMPGGIDVHTHFQMPYK
QIGDNLIVPGGVK
EHALLAYTLGVK
SVEMHHEALSEALPGDNVGFNVK
THINIVVIGHVDSGK
YYVTIIDAPGHR
GSFKYAWVLDK
KHHLCGETEEER
PMILGYWNVR
YAMGDAPDYDR
KITQSNAIMR
ADIVENQVMDNR
GLTHPIR
EVDEQMLAIQSK
IMNTFSVVPSPK
VREEYPDR
MSSTFIGNSTAIQELFK
ALTVPELTQQMFDAK
GIAVIVTGQGEQYER
MTDGYSGSDLTALAK
GLLLFGPPGNGK
LQLLESGAVPK
VYVSLPNEETR
DLGATWVVLGHSER
VVLAYEPVWAIGTGK
VTNGAFTGEISPGMIK
TATPQQAQEVHEK
DFTVSAMHGDMDQK
GIYAYGFEKPSAIQQR
MFVLDEADEMLSR
VLITTDLLAR
VFDMLNR
LTFVDFLTYDVLDQNR
MLLEFTDTSYEEK
VDIMENQIMDFR
FTWFAGEK
AADHVEDLPGALSTLSDLHAHK
MFAAFPTTK
TYFSHIDVSPGSAQVK
IINEPTAAAIAYGLDKR
SQIFSTASDNQPTVTIK
ITPSYVAFTPEGER
ELEEIVQPIISK
FLEQQNQVLQTK
LALDVEIATYR
FASFIDK
SLDLDSIIAEVK
LRSEIDNVKK
ADLEMQIESLTEELAYLK
QSLEASLAETEGR
DAEAWFNEK
LTQTQGKTR
IKEWYEK
TVQGLEIELQSQLALK
RVLDELTLSK
AAVPSGASTGIYEALELR
DATNVGDEGGFAPNILENK
FTATAGIQVVGDDLTVTNPK
MGAGMGFGLER
MGLAMGGAGGASFDR
IGGMEGPFGGGMENMGR
ALTVPELTQQVFDAK
ISVYYNEATGGK
AVLVDLEPGTMDSVR
INVYYNEATGGNYVPR
EIVHLQAGQCGNQIGAK
IREEFPDR
MAATFIGNSTAIQELFK
KSESEVEEAAAIIAQRPDNPR
LAASGEGGLQELSGHFENQK
MPFPVNHGASSEDSLLQDAAK
MQLKPMEINPEMLNK
SFDALLADLTR
SLSDNINLPQGVR
EHGLIFMETSAK
TASNVEEAFINTAK
IGAADYQPTEQDILR
TTGIVETHFTFK
LGGSAVISLEGKPL
NIILEEGKEILVGDVGQTVDDPYTTFVK
SQNVMAAASIANIVK
FATEAAITILR
IFVGGIKEDTEEYNLR
IETIEVMEDR
DVLSVAFSSDNR
IWDLEGK
LWDLTTGTTTR
VQIVYKPVDLSK
SPVVSGDTSPR
IGSLDNITHVPGGGNK
VGDTIPSVEVFEGEPGKK
FSMVIDK
KVNLAELFK
VQLLADPTGAFGK
LQIWDTAGQER
LLLIGDSGVGK
FAQPGSFEYEYAMR
LFVGNLPPDITEEEMR
GVVDSEDLPLNISR
IDIIPNPQER
ALLFIPR
ELISNASDALDK
LLKLEYLQEK
LEYLQEK
KEGGLGPLNIPLLADVTK
GLFIIDAK
SLSQNYGVLK
VVYTGIYDTEGVAPTK
IQPNDGPVFFK
WLLATAGVEFEEEFLETR
VETGILRPGMVVTFAPVNITTEVK
LALDIEIATYR
ALNNKFASFIDK
GHVFEESQVAGTPMFVVK
ITSFPESESYSYETTTK
QVKPYVEEGLHPQIIIR
APILIATDVASR
LFIGGLNVQTSESGLR
FAEAFEAIPR
VAVFGAGGVGK
KDDEENYLDLFSHK
AIVAIENPADVSVISSR
EAFQEALAAAGDK
IFVGGLNPEATEEK
TITLEVEPSDTIENVK
VTIAQGGVLPNIQAVLLPK
VDQETLTEMVKPSIDYVR
HQAQVDQYLGLVR
KIEEIKDFLLTAR
GPDGLTALEATDNQAIK
LVARPEPATGFTLEFR
YALYDASFETK
VLEVPPIVYLR
AQVAQPGGDTIFGK
AAATPESQEPQAK
TLEHINAILLGAYR
KFLEGNSMKLASLER
ETNLESLPLVDTHSK
AGQSVIGLQMGTNK
DYQELMNTK
TNAENEFVTIK
LPQMIK
LTQSVTEVR
GNDGGFVYIADK
GLVQTPR
MLKNFIETK
QVHPDTGISSK
LLLPGELAK
ESYSVYVYK
LERPHDR
DFVAAVWK
LPELQIK
VFLENVIR
YIADRK
KSAMLLR
VGMIPVPYVEK
LINQPLPDLK
EKFEEMIAQIK
FSAFLDK
IPNLLPDDAVDNK
LGLPELLSR
VLFRESIQKGER

## Sheet: spastin
Sequence
ALMAAKRSSGTAPAPASPSTPAPGPGGEAESVR
APSCSGLSMVSGAR
AVAAESNATFFNISAASLTSK
DAALGPIRELKPEQVK
DPLTHASNSLPR
DRLQLLESGAVP
DRLQLLESGAVPK
DRLQLLESGAVPKK
ELAQLARMTDGYSGSDLTALAK
ELEKGIAVIVTGQGEQYER
ELKPEQVKNMSASEMR
FDDIAGQELAK
GATNRPQELDEAVLR
GIAVIVTGQGEQYER
GIAVIVTGQGEQYERA
GIEELEKGIAVIVTGQGEQYER
GQKEQAVEWYK
GTAPAPASPSTPAPGPGGEAESVR
GTAVKFDDIAGQELAK
IAVIVTGQGEQYER
IDEEEKGQKEQAVEWYK
IDEEEKGQKEQAVEWYKK
KDPLTHASNSLPR
KGIEELEKGIAVIVTGQGEQYER
KKDPLTHASNSLPR
KPSTPTTAVR
LIEFDGVQSAGDDR
LIMNEIVDNGTAVK
LKTEFLIEFDGVQSAGDDR
LQLLESGAVPKK
MMTNLVMAKDR
MTDGYSGSDLTALAK
NISAASLTSK
NVDSNLANLIMNEIVDNGTAVK
PLTHASNSLPR
PSCSGLSMVSGAR
QGSPLTQKELAQLAR
RPQELDEAVLR
RSSGTAPAPASPSTPAPGPG
RSSGTAPAPASPSTPAPGPGG
RSSGTAPAPASPSTPAPGPGGEA
RSSGTAPAPASPSTPAPGPGGEAES
RSSGTAPAPASPSTPAPGPGGEAESVR
RSSGTAPAPASPSTPAPGPGGEAESVRV
RSVSPQTLEAYIR
RTNKPSTPTTAVR
RVYVSLPNEETR
SGLSMVSGAR
SGSDLTALAK
SGSTGLSGH
SGSTGLSGHHR
SGTAPAPASPSTPAPGPGGEAESVR
SPQTLEAYIR
SPSTPAPGPGGEAESVR
SSGTAPAPASPSTPAPGPGGEAESVR
SSGTAPAPASPSTPAPGPGGEAESVRV
STGLSGHHR
STPAPGPGGEAESVR
SVSPQTLEAYIR
TAPAPASPSTPAPGPGGEAESVR
TEFLIEFDGVQSAGDDR
THASNSLPR
TNKPSTPTTA
TNKPSTPTTAVR
TVMKSGSTGLSGH
TVMKSGSTGLSGHHR
VEWYKKGIEELEKGIAVIVTGQGEQYER
VLVMGATNRPQELDEAVLR
APAPASPSTPAPGPGGEAESVR
PGSGPAATTHK
PGGEAESVR
GQKEQAVEWYKK
LANLIMNEIVDNGTAVK
SSGTAPAPASPSTPAPGPGGEAESVRVFHK
YVGEGEKLVR
QAFEYISIALR
ELQPSIIFIDEVDSLLCER
EQAVEWYKK
TPAPGPGGEAESVR
GLLLFGPPGNGK
QGSPLTQK
DAALGPIR
GTSKPNRTNKPSTPTTAVR
NMSASEMR
SKTVMKSGSTGLSGHHR
LSDFTESLKK
IDEEEKGQK
LQLLESGAVPK
KGIEELEK
DAALGPIRELKPEQVKNMSASEMR
EGEHDASR
GLLLFGPPGNGKTMLAK
VYVSLPNEETR
MMTNLVMAK
LSDFTESLK
REGEHDASR
ALFAVAR
IDEEEK
SSGTAPAPASPSTPAPGPGGEAES
TDGYSGSDLTALAK
TNKPSTPTTAVRK
ELAQLAR
SGTAPAPASPSTPAPGPGGEAES
DRLQLLESGAVPKKK
AKDRLQLLESGAVPKKKDPLTHASNSLPR
MSASEMR
GTSKPNR
YVGEGEK
GIEELEK
RSSGTAPAPASPSTPAPGPGGEAE
ARMTDGYSGSDLTALAK
DRLQLLESGA
AAKRSSGTAPAPASPSTPAPGPGGEAESVR
VSGARPGSGPAATTHK
TQKELAQLARMTDGYSGSDLTALAK
KKDPLTHA
MTNLVMAK
TNRPQELDEAVLRRFIKRVYVSLPNEETR
KKDPLTHASN
LQLLESGAVPKKK
KIKRSVSPQTLEAYIR
PGSGPAATTHKGTSKPNR
AFVHWYVGEGMEEGEFSEAR
AVFVDLEPTVIDEVR
DLAKVQRAVCMLSNTTAIAEAWAR
DVNAAIATIK
DVNAAIATIKTK
IHFPLATYAPVISAEK
LDHKFDLMYAK
NLDIERPTYTNLNR
QLFHPEQLITGK
QLFHPEQLITGKEDAANNYAR
TIGGGDDSFNTFFSETGAGK
VCMLSNTTAIAEAWAR
VGINYQPPTVVPGGDLAK
LSVDYGKK
EDAANNYAR
FDLMYAK
LSVDYGK
EIIDLVLDR
GHYTIGK
EDMAALEK
AILVDLEPGTMDSVR
ALTVPELTQQVFDAK
FPGQLNADLR
GHYTEGAELVDSVLDVVR
IMNTFSVVPSPK
IREEYPDR
ISEQFTAMFR
ISVYYNEATGGK
KLAVNMVPFPR
LAVNMVPFPR
MSMKEVDEQMLNVQNK
YLTVAAVFR
EVDEQMLNVQNK
FWEVISDEHGIDPTGTYHGDSDLQLDR
NSSYFVEWIPNNVK
TAVCDIPPR
NMMAACDPR
SLGGGTGSGMGTLLISK
DLYANTVLSGGTTMYPGIADR
DSYVGDEAQSKR
EITALAPSTMK
GYSFTTTAER
HQGVMVGMGQK
KDLYANTVLSGGTTMYPGIADR
QEYDESGPSIVHR
SYELPDGQVITIGNER
TTGIVMDSGDGVTHTVPIYEGYALPHAILR
VAPEEHPVLLTEAPLN
VAPEEHPVLLTEAPLNPK
YPIEHGIVTNWDDMEK
AVFPSIVGR
IKIIAPPER
AVFPSIVGRPR
VAPEEHPVLLTEAPLNPKANR
DLTDYLMK
IIAPPER
RGILTLK
TVLSGGTTMYPGIADR
MQKEITALAPSTMK
DAGTIAGLNVLR
IINEPTAAAIAYGLDK
IINEPTAAAIAYGLDKK
RFDDAVVQSDMK
SQIHDIVLVGGSTR
STAGDTHLGGEDFDNR
TTPSYVAFTDTER
NQVAMNPTNTVFDAK
VQVEYKGETK
MKEIAEAYLGK
LDKSQIHDIVLVGGSTR
VEIIANDQGNR
TVTNAVVTVPAYFNDSQR
ITITNDKGR
GTLDPVEK
MVQEAEK
DAVTYTEHAKR
DNIQGITKPAIR
IQGITKPAIR
ISGLIYEETR
KTVTAMDVVYALK
KTVTAMDVVYALKR
TVTAMDVVYALKR
TVTAMDVVYALK
DAVTYTEHAK
VFLENVIR
ISGLIYEETRGVLK
DNIQGITK
AFLSSPDHLNRPINGNGK
AFLSSPDHLNRPINGNGKQ
EAALVDMVNDGVEDLR
FEDGDLTLYQSNAILR
PPYTIVYFPVR
YGTLIYTNYENGKDDYVK
ALPGHLKPFETLLSQNQGGK
SLGLYGKDQK
YGTLIYTNYENGK
LKPFETLLSQNQGGK
ASDAEIMSSQSALALDER
ITSFPESESYSYETTTK
SSYYVVSGNDPAAEEPSR
TPEEGGYSYEISEK
TPEVSGYTYEK
AVLDALLEGK
DMSLYASLASEK
SDISPLTPR
HMDPPPAPMQDR
NVDVEFFK
DLTGQVSTPPVK
NVDVEFFKR
TTTTPEVK
SKPSAASPKPGALK
KEEPTKKEPIAAGK
MVDPEALAIEQNLGK
AMGIMNSFVNDIFER
HAVSEGTKAVTK
KESYSVYVYK
LLLPGELAKHAVSEGTK
SFVNDIFER
QVHPDTGISSK
AVTKYTSSK
HAVSEGTK
LLLPGELAK
VLKQVHPDTGISSK
LAHYNKR
ESYSVYVYK
IAGEASR
RSTITSR
ADIVENQVMDNR
IRADIVENQVMDNR
LLLEYTDSSYEEK
LLLEYTDSSYEEKR
LGLDFPNLPYLIDGSR
YAMGDAPDYDR
KITQSNAIMR
RPWFAGDK
YLSTPIFSK
KHHLCGETEEER
LYSEFLGK
SQWLNEK
GLTHPIR
ALAAAGYDVEKNNSR
KASGPPVSELITK
SETAPAAPAAAPPAEK
SETAPAAPAAAPPAEKAPAK
SGVSLAALKK
KALAAAGYDVEKNNSR
KPAAAAVTK
ALAAAGYDVEK
SGVSLAALK
ASGPPVSELITK
DIGAIAQVHAENGDIIAEEQQR
GSPLVVISQGK
IVLEDGTLHVTEGSGR
MDENQFVAVTSTNAAK
NLHQSGFSLSGAQIDDNIPR
QIGENLIVPGGVK
MVIPGGIDVHTR
TVTPASSAK
GIQEEMEALVK
MSVIWDK
AIAELGIYPAVDPLDSTSR
FTQAGSEVSALLGR
IMDPNIVGSEHYDVAR
LVLEVAQHLGESTVR
TIAMDGTEGLVR
IMNVIGEPIDER
VVDLLAPYAK
VLDSGAPIKIPVGPETLGR
IPSAVGYQPTLATDMGTMQER
EHALLAYTLGVK
SVEMHHEALSEALPGDNVGFNVK
VETGVLKPGMVVTFAPVNVTTEVK
IGGIGTVPVGR
STTTGHLIYK
LPLQDVYK
MDSTEPPYSQK
YYVTIIDAPGHR
KLEDGPK
TIEKFEK
QLIVGVNK
EGRPSGEAFVELESEDEVK
HTGPNSPDTANDGFVR
MMLGAEGGEGFVVK
STGEAFVQFASQEIAEK
VHIEIGPDGR
VTGEADVEFATHEDAVAAMSK
MLGAEGGEGFVVK
THYDPPR
YIEIFK
IQNGAQGIR
SNNVEMDWVLK
APILIATDVASR
DMVGIAQTGSGK
ELAQQVQQVADDYGK
SSQSSSQQFSGIGR
VLEEANQAINPK
LTPYEVDELR
LIDFLESGK
SGKAPILIATDVASR
IYGGAPKGPQIR
GAAQNIIPASTGAAK
LISWYDNEYGYSNR
VVDLMAYMASK
VVDLMAYMASKE
AGIALNDNFVK
VIISAPSADAPMFVMGVNHEK
TVDGPSGK
QAAEGPLK
VGVNGFGR
LVINGKPITIFQER
ILGADTSVDLEETGR
TGAIVDVPVGDELLGR
TGTAEMSSILEER
VVDALGNAIDGK
VLSIGDGIAR
TSIAIDTIINQK
AVDSLVPIGR
DATNVGDEGGFAPNILENK
IDQLMIEMDGTENK
AAVPSGASTGIYEALELR
GNPTVEVDLYTAK
IGAEVYHNLK
IEEELGSK
TIAPALVSK
KLNVVEQEK
IETIEVMEDR
IFVGGIKEDTEEYNLR
YGKIETIEVMEDR
RGEEGHDPKEPEQLR
EDSVKPGAHLTVK
GFAFVTFDDHDTVDK
EDTEEYNLR
MEVKPPPGRPQPDSGR
KIFVGGIKEDTEEYNLR
AVSREDSVKPGAHLTVK
GVVDSEDLPLNISR
YHTSQSGDEMTSLSEYVSR
NPDDITQEEYGEFYK
TLTLVDTGIGMTK
HLEINPDHPIVETLR
YIDQEELNK
LGIHEDSTNR
GMTTVDDFFQGTK
GMYDGPVFDLTTTPK
IMLEDGNLHVTQGAGR
NLHQSGFSLSGTQVDEGVR
AALAGGTTMIIDHVVPEPESSLTEAYEK
IFNLYPR
QIGDNLIVPGGVK
INVLEGDEQFINAAK
LGEHNINVLEGDEQFIN
LGEHNINVLEGDEQFINAA
LGEHNINVLEGDEQFINAAK
LGEHNINVLEGDEQFINAAKIIKHPN
TLNNDIMLIK
LGEHNINVLEGDEQFINA
QSLEASLAETEGR
KLTQTQGKTR
LKYENEVALR
VTMQNLNDR
DAEAWFNEK
LAADDFR
LTQTQGKTR
EILVGDVGQTVDDPYTTFVK
YALYDATYETK
LGGSAVISLEGKPL
ASGVAVSDGVIK
KSSTPEEVK
MIYASSK
VFNDMK
SSTPEEVK
ALAAGGYDVEKNNSR
ALAAGGYDVEK
SETAPAETTAPAPVEK
GGVSLPALK
GGVSLPALKK
KALAAGGYDVEK
KATGPPVSELITK
GTLVQTK
ATGPPVSELITK
KALAAGGYDVEKNNSR
AGLQFPVGR
IQAVLLPK
NDEELNKLLGK
NDEELNK
VTIAQGGVLPNIQAVLLPK
HLQLAIR
KGNYAER
IMNTFSVMPSPK
INVYYNEATGNK
ALTVPELTQQMFDSK
FWEVISDEHGIDPTGSYHGDSDLQLER
KDDEENYLDLFSHK
DKAKEEELR
DPSGAHPSVR
RLQEETGAK
ILGPQGNTIK
LQEETGAK
AKEEELR
SLDLDSIIAEVK
TAAENEFVTLK
YEELQITAGR
TAAENEFVTLKK
IAEAEQR
HSGPNSADSANDGFVR
ITGEAFVQFASQELAEK
MLGPEGGEGYVVK
TEMDWVLK
SYSDPPLK
YIEVFK
LAAVDATVNQVLASR
TGEAIVDAALSALR
NLEPEWAAAATEVK
NKPEDYQGGR
ITPSYVAFTPEGER
SQIFSTASDNQPTVTIK
NQLTSNPENTVFDAK
ELEEIVQPIISK
RPAEDMEEEQAFKR
TDYNASVSVPDSSGPER
NLPLPPPPPPR
DLAGSIIGK
DYDDMSPR
NTDEMVELR
EIAQDFKTDLR
KSAPATGGVK
STELLIR
YQKSTELLIR
YRPGTVALR
RVTIMPK
SAPATGGVK
KQLATK
SKPGAAMVEMADGYAVDR
ISRPGDSDDSR
SSSGLLEWDSK
FSTPEQAAK
IRVDILENQLMDNR
VDILENQLMDNR
YTMGDAPDFDR
MAIWGSK
GLAHAIR
IQDKEGIPPDQQR
TITLEVEPSDTIENVK
ESTLHLVLR
MQIFVK
EGIPPDQQR
ALTVPELTQQMFDAK
EVDEQMLAIQSK
ISVYYNEASSHK
YLTVATVFR
VREEYPDR
MFVLDEADEMLSR
VLITTDLLAR
GYDVIAQAQSGTGK
AADHVEDLPGALSTLSDLHAHK
IGGHGGEYGEEALQR
MFAAFPTTK
AIVAIENPADVSVISSR
FAAATGATPIAGR
LLVVTDPR
MLLEFTDTSYEEK
IAAFLQSDR
VDIMENQIMDFR
LFEEPEDPSNR
NAAQFLLSTNDK
VVIFQQEQENK
VVAGVASALAHK
VNPDDVGGEALGR
VHLTDAEK
VINAFNDGLK
SLSDNINLPQGVR
GIVYAVSSDR
NVNPNWSVNVK
GNPSATAGPK
APQSLASSNSAQAR
LKQQSELQSQVR
GFSVVADTPELQR
DAEDAMDAMDGAVLDGR
VGDVYIPR
SYGRPPPDVEGMTSLK
RPDQQLQGDGK
SAAQAAAQTNSNAAGK
EAGGGGVGGPGAK
SKSEEAHAEDSVMDHHFR
SAADIIALAR
IAVGSDADVVIWDPDKMK
SIPHITSDR
FLEQQNQVLQTK
NKYEDEINKR
MEISELNR
AVAQALEVIPR
TAVETAVLLLR
IVLLDSSLEYK
AVTEQGAELSNEER
LAEQAER
NLLSVAYK
VISSIEQK
SLAENYFDSTGR
LTPEFSHR
ELLQQMER
GDLGIEIPAEK
LDIDSAPITAR
IENHEGVR
GSGTAEVELKK
AASADSTTEGAPTDGFTVLSTK
AGVIFPVGR
SIAFPSIGSGR
SLFLGQK
FAEAFEAIPR
DVDEVSSLLR
LVPGGGATEIELAK
IGAADYQPTEQDILR
LLLLGAGESGK
AAGVEAAAEVAATEPK
MGANSLER
INEILSNALK
AVLVDLEPGTMDSVR
EVDEQMLSVQSK
IREEFPDR
IFVGGLNPEATEEK
EVYQQQQYGSGGR
VYVGNLGNNGNKTELER
VELSNGEK
NDEELNKLLGR
YALYDASFETK
ASGVQVADEVCR
GVGIISEGNETVEDIAAR
PAAPAAPAP
SETAPAAPAAPAPAEK
TLSDNVNLPQGVR
GFSSGSAVVSGGSR
GAEAANVTGPGGVPVQGSK
GIDPFSLDALAK
LREDENAEPVGTTYQK
GPDGLTALEATDNQAIK
AAQGEPQVQFK
NLQYYDISAK
LVLVGDGGTGK
MEQIKENR
EANLAAIIER
EAVAMESFAK
DASLMVTNDGATILK
GATQQILDEAER
SQGGEPTYNVAVGR
LQTAPVPMPDLK
TPPGSGEPPK
ALYETELADAR
ASAPATPLSPTR
KGDAPAAEAEAK
INVYYNEAAGNK
IFVGGLSPDTPEEK
TATPQQAQEVHEK
GDEELDSLIK
MPFPVNHGASSEDSLLQDAAK
LSPEDR
GVTIASGGVLPR
LQIWDTAGQER
MGPGATAGGAEK
GIVEFSGKPAAR
VELDNMPLR
REQEIR
RQEELR
GNLGAGNGNLQGPR
SQAFIEMETR
GPGPLQER
DSFDDRGPSLNPVLDYDHGSR
TAEGQALSEAR
YSDMIVAAIQAEK
LVTTGVLK
AQVAQPGGDTIFGK
GLVQTPR
ALEAELAALR
LLQLVEDR
TTYLVLDEADR
DVLSVAFSSDNR
LWDLTTGTTTR
VLVDQTTGLSR
SLSQNYGVLK
GLFIIDAK
NDEGIAYR
TPGTPGTPSYPR
VGSLDNAHHVPGGGNVK
IADGYEQAAR
NMPQADAMVLVAR
TVVAGSSEAAQK
AAPAAAAAAPPGPR
YGEPGEVFINK
EMEEQMR
GLISSLPR
LLGALLSK
TKDIEDVFYK
IYVGNLPPDIR
LAPDYDALDVANK
VKEGMSIVEAMER
ESTGAQVQVAGDMLPNSTER
TIAQDYGVLK
WELLQQVDTSTR
TNAENEFVTIK
TNAENEFVTIKK
LLEQYKEESK
LGDLYEEEMR
LGSILSPR
FSSQQVSTK
DIFPYSENKEK
GPSSVEDIK
NIEDVIAQGVGK
FVMQEEFSR
VAVFGAGGVGK
AAPFTLEYR
GQYISPFHDVPIYADK
AGDLVFAK
YRLRMHTLQLVDLR
LLAQDIRK
LSAKPAPPKPEPKPK
QLGLATK
DLTEYLSR
FTEYETQVK
KMDEADASSAVK
IQQEIAVQNPLVSER
LASYLDK
ATMQNLNDR
AVPQLQGYLR
LLKLEYLQEK
EIISEVQR
APQVSTPTLVEAAR
REEIER
ITNLDLEK
VGGTSDVEVNEK
WKDSDEADLVLAK
DTLYEAVR
KLLDEGR
LMDEVAGIVAAR
AMQGLTGR
QLNENKQER
AAATPESQEPQAK
EVFEMATR
VLVVDQLSMR
VNEMSAILR
TADKLTEVAAVR
ALYEELDLR
KQDAESLQR
IASEASR
ELAGPAVTIR
ESFTLKAQTVWHTVLDLR
TILALNHGLDK
LPQMIK
EVYMGNVIQGGEGQAPTR
EHMQPTHPIR
EMPLLK
GNDGGFVYIADK
LLKSTSAGAK
VETFEADIKEDR
FKTIVDKMAIDK
TVETLVERYGR
LAVASLLK
SQEILVDLKSALEK
FLIPNASQPESK
STSRVPADVASAQEDLR
ELALKNPNK
LAEAQER
LAMLAIPK
AVAAQLAR
GSVWDALVAK
LQAQLAR
TALIHDGLAR
TDTGEPMGR
LGIHEDSQNR
NPDDITNEEYGEFYK
TLTIVDTGIGMTK
ALEFGPR
TLLEAENSR
VTRLTPR
KTEAPAAGPEAK
REALGESAAK
FTDEEVDELYR
AVSAIVQK
VGPDLSRR
