# Supplementary material for: 14-3-3 protein augments the protein stability of phosphorylated spastin and promotes the recovery of spinal cord injury through its agonist intervention
Source: eLife. 2024 Jan 17;12:RP90184. doi: 10.7554/eLife.90184 (PMC10945579; doi:10.7554/eLife.90184)
Supplement: Figure 1—source data 3. [file elife-90184-fig1-data3.xlsx]

## Sheet: Sheet1
	Intensity(a.u)
pixel	14-3-3	spastin
1	0.0116	0
2	0.0139	0
3	0.0128	0.0023
4	0.0151	0.0023
5	0.007	0.0093
6	0.0174	0.0093
7	0.1289	0.007
8	0.0383	0.007
9	0.0256	0.0093
10	0.0116	0.0128
11	0.0395	0.0302
12	0.0941	0.0569
13	0.252	0.144
14	0.4715	0.4239
15	0.6016	0.7096
16	0.878	1.295
17	1.6597	1.7561
18	2.266	1.9768
19	2.0058	2.453
20	1.3182	2.6167
21	1.2799	2.9652
22	1.0604	3.0302
23	1.0476	2.9849
24	1.3322	2.5099
25	1.4657	2.2985
26	1.2137	2.0906
27	1.2439	1.9501
28	1.2033	1.5842
29	0.8839	0.8513
30	0.5412	0.3461
31	0.3101	0.1754
32	0.2184	0.144
33	0.151	0.2021
34	0.0929	0.2439
35	0.0592	0.1986
36	0.0453	0.1649
37	0.0139	0.0952
38	0.0174	0.0581
39	0.036	0.0627
40	0.036	0.0674
41	0.0813	0.0708
42	0.0999	0.0488
43	0.1185	0.0476
44	0.0859	0.0441
45	0.1638	0.0662
46	0.3055	0.1092
47	0.2021	0.0557
48	0.0883	0.0314
49	0.0465	0.0348
50	0.0732	0.0674
51	0.0952	0.0871
52	0.259	0.0407
53	0.3206	0.0232
54	0.1638	0.0279
55	0.0859	0.0395
56	0.0627	0.029
57	0.0267	0.0232
58	0.0418	0.0511
59	0.007	0.0836
60	0.0081	0.0244
61	0.0035	0.0244
62	0.0139	0.0116
63	0.0209	0.0232
64	0.0244	0.043
65	0.0116	0.0163
66	0.0105	0.0139
67	0.0093	0.0174
68	0.0116	0.0186
69	0.0023	0.007
70	0.0023	0.0023
71	0.007	0.0023
72	0.029	0.0093
73	0.1324	0.0105
74	0.216	0.0093
75	0.2509	0.0314
76	0.2822	0.0256
77	0.3345	0.0476
78	0.2184	0.0465
79	0.1185	0.029
80	0.043	0.0163
81	0.0256	0.0093
82	0.0244	0.007
83	0.0627	0.0221
84	0.1777	0.0407
85	0.2265	0.0407
86	0.2474	0.0465
87	0.2242	0.0616
88	0.3542	0.0499
89	0.6144	0.0674
90	0.4588	0.0801
91	0.1556	0.0557
92	0.0627	0.0174
93	0.0465	0.0035
94	0.0952	0.0105
95	0.072	0.0244
96	0.1545	0.036
97	0.1649	0.029
98	0.2207	0.0197
99	0.1707	0.0221
100	0.1312	0.0499
101	0.2067	0.0662
102	0.3391	0.0894
103	0.7305	0.1115
104	0.748	0.1603
105	0.2242	0.2323
106	0.1661	0.1312
107	0.101	0.1324
108	0.1626	0.1429
109	0.2358	0.1556
110	0.2462	0.1394
111	0.4228	0.0743
112	0.2195	0.0592
113	0.2485	0.0778
114	0.2509	0.0604
115	0.1963	0.0708
116	0.3066	0.0987
117	0.2265	0.1893
118	0.3751	0.547
119	0.856	0.8606
120	1.5563	1.0348
121	2.1974	1.3868
122	3.0023	1.7364
123	2.374	1.2834
124	1.9524	0.8293
125	1.6771	0.5935
126	1.1858	0.338
127	0.8316	0.2846
128	0.5714	0.2892
129	0.7422	0.3635
130	0.9733	0.5923
131	1.1626	0.7758
132	1.1173	0.6353
133	0.6702	0.5366
134	0.6156	0.5168
135	1.1115	0.7782
136	1.1835	1.101
137	2.2311	1.0035
138	2.007	0.8153
139	1.9803	0.7201
140	1.6376	0.5203
141	1.9861	0.5319
142	1.6585	0.511
143	1.0325	0.3891
144	1.0639	0.3055
145	0.7352	0.331
146	0.6771	0.36
147	0.6307	0.3461
148	0.4332	0.331
149	0.5203	0.2613
150	0.417	0.216
151	0.3148	0.2741
152	0.2509	0.4332
153	0.367	0.6585
154	1.0395	0.9535
155	1.9013	1.4088
156	2.1324	1.7561
157	2.0023	1.8711
158	1.2706	1.7758
159	0.8235	1.6887
160	1.0221	1.4855
161	1.2729	1.489
162	1.4634	1.4971
163	1.741	1.619
164	2.2416	1.7526
165	2.3844	1.8699
166	2.6876	1.885
167	2.2067	1.8815
168	1.7259	2.0848
169	1.4286	2.4181
170	1.8049	2.4971
171	2.8235	2.5505
172	3.3473	2.7944
173	3.1231	3.0674
174	3.0163	2.7294
175	2.7305	2.331
176	1.7027	1.7247
177	0.6713	0.6702
178	0.3438	0.403
179	0.1603	0.2056
180	0.1034	0.1521
181	0.2439	0.158
182	0.1603	0.1185
183	0.122	0.1161
184	0.0999	0.0929
185	0.1103	0.0674
186	0.2079	0.0813
187	0.6643	0.0836
188	0.8479	0.0697
189	0.4297	0.0407
190	0.1731	0.0221
191	0.1405	0.0337
192	0.0592	0.0383
193	0.0163	0.0732
194	0.0244	0.1266
195	0.0906	0.0767
196	0.2265	0.0302
197	0.1696	0.0639
198	0.0639	0.0453
199	0.0534	0.0499
200	0.0848	0.1556
201	0.3891	0.2102
