# Supplementary material for: 14-3-3 protein augments the protein stability of phosphorylated spastin and promotes the recovery of spinal cord injury through its agonist intervention
Source: eLife. 2024 Jan 17;12:RP90184. doi: 10.7554/eLife.90184 (PMC10945579; doi:10.7554/eLife.90184)
Supplement: Figure 2—source data 2. [file elife-90184-fig2-data2.xls]

## Sheet: Sheet1
Neurite length
	Vector	Spastin	Spastin(S233A)	Spastin(S233D)
1	1580.98	2415.8	1669.04	4942.47
	1310.82	1985.84	1379.43	3289.07		Length	Vector	Spastin	Spastin(S233A)	Spastin(S233D)
	1115.22	2382.83	1975.04	3851.37			1335.68	2261.49	1674.5	4027.64
							1667.53	2448.82	1368.14	3360.99
							1146.73	2893.57	1716.09	3767.49
	1903.77	2549.57	1183.78	3414.86
2	1414.49	2267.29	1558.21	3684.19
	1684.34	2529.6	1362.44	2983.92		Number
							Vector	Spastin	Spastin(S233A)	Spastin(S233D)
							15	26.3333	16.3333	42.6667
3	1258.92	2734.32	1731.11	3547.88			12.6667	28.6667	17	37.3333
	1226.62	2224.4	1638.11	4149.54			11	21.6667	17	40.3333
	954.664	3721.98	1779.06	3605.04
Neurite number
	Vector	Spastin	Spastin(S233A)	Spastin(S233D)
1	15	25	17	45
	17	19	20	43
	13	35	12	40
2	13	36	21	36
	10	21	15	26
	15	29	14	50
3	7	19	12	48
	13	25	21	28
	13	21	18	45
