# Supplementary material for: 14-3-3 protein augments the protein stability of phosphorylated spastin and promotes the recovery of spinal cord injury through its agonist intervention
Source: eLife. 2024 Jan 17;12:RP90184. doi: 10.7554/eLife.90184 (PMC10945579; doi:10.7554/eLife.90184)
Supplement: Figure 3—source data 2. [file elife-90184-fig3-data2.xlsx]

## Sheet: Sheet1
		Hours	GFP-Spastin			GFP-Spsastin+Flag-14-3-3
		0	1	1	1	1	1	1
		3	0.868783	0.986345	0.923183	1.01219	1.13674	1.08719
		6	0.956636	1.18058	0.860417	1.06422	0.971857	1.11774
		9	0.617743	0.7556	0.652496	0.835158	0.953067	0.869358
		12	0.126646	0.275902	0.354958	0.97133	0.874019	0.790776
