# Supplementary material for: 14-3-3 protein augments the protein stability of phosphorylated spastin and promotes the recovery of spinal cord injury through its agonist intervention
Source: eLife. 2024 Jan 17;12:RP90184. doi: 10.7554/eLife.90184 (PMC10945579; doi:10.7554/eLife.90184)
Supplement: Figure 3—source data 3. [file elife-90184-fig3-data3.xlsx]

## Sheet: Sheet1
		GFP-Spastin			GFP-Spsastin(233A)			GFP-Spastin(233D)
	0	1	1	1	1	1	1	1	1	1
	3	0.968782	1.18634	0.923183	0.868783	0.945758	1.24678	1.10588	0.923596	0.920489
	6	0.956636	1.08058	0.860417	0.956636	0.876364	0.956636	0.942569	0.955997	0.943923
	9	0.617743	0.7556	0.652496	0.517743	0.417743	0.347658	1.06546	0.942559	1.11726
	12	0.226646	0.175902	0.354958	0.056463	0.107643	0.084576	0.897798	0.996917	1.07775
