# Supplementary material for: 14-3-3 protein augments the protein stability of phosphorylated spastin and promotes the recovery of spinal cord injury through its agonist intervention
Source: eLife. 2024 Jan 17;12:RP90184. doi: 10.7554/eLife.90184 (PMC10945579; doi:10.7554/eLife.90184)
Supplement: Figure 3—source data 4. [file elife-90184-fig3-data4.xlsx]

## Sheet: Sheet1
		GFP-Spastin			GFP-Spsastin+Flag-14-3-3
	0	1	1	1	1	1	1
	3	1.03702	1.15046	1.13021	1.06383	0.955866	1.13931
	6	1.16813	0.958539	1.05071	1.04733	0.94423	1.03584
	9	1.21631	1.0579	0.985455	1.64376	1.94813	1.62296
	12	0.893753	1.18383	0.992598	1.74439	2.08818	1.70015
