# Supplementary material for: 14-3-3 protein augments the protein stability of phosphorylated spastin and promotes the recovery of spinal cord injury through its agonist intervention
Source: eLife. 2024 Jan 17;12:RP90184. doi: 10.7554/eLife.90184 (PMC10945579; doi:10.7554/eLife.90184)
Supplement: Figure 3—source data 5. [file elife-90184-fig3-data5.xlsx]

## Sheet: Sheet1
			GFP-Spastin			GFP-Spsastin+Flag-14-3-3
		0	1	1	1	1	1	1
		3	0.937017	1.15046	1.03021	0.990738	1.19074	1.10411
		6	1.06813	0.958539	1.05071	0.985909	1.18591	1.00222
		9	1.01631	0.937682	1.00877	1.78798	1.78798	2.04507
		12	0.993753	1.18383	0.992598	2.01241	2.01241	1.7895
