# Supplementary material for: 14-3-3 protein augments the protein stability of phosphorylated spastin and promotes the recovery of spinal cord injury through its agonist intervention
Source: eLife. 2024 Jan 17;12:RP90184. doi: 10.7554/eLife.90184 (PMC10945579; doi:10.7554/eLife.90184)
Supplement: Figure 3—source data 6. [file elife-90184-fig3-data6.xlsx]

## Sheet: Sheet1
	Control	MG132	CHX	MG132+CHX
	1	1.91165	0.485298	0.838521
	1	1.82952	0.217335	0.854654
	1	1.78568	0.222913	0.905543
