# Supplementary material for: 14-3-3 protein augments the protein stability of phosphorylated spastin and promotes the recovery of spinal cord injury through its agonist intervention
Source: eLife. 2024 Jan 17;12:RP90184. doi: 10.7554/eLife.90184 (PMC10945579; doi:10.7554/eLife.90184)
Supplement: Figure 3—source data 7. [file elife-90184-fig3-data7.xlsx]

## Sheet: Sheet1
	Spastin	Spastin(S233A)	Spastin（S233D)	Spastin+R18
	1	1.63246	0.194271	1.37995
	1	1.67199	0.235255	1.32194
	1	1.50728	0.168591	1.26498
