# Supplementary material for: 14-3-3 protein augments the protein stability of phosphorylated spastin and promotes the recovery of spinal cord injury through its agonist intervention
Source: eLife. 2024 Jan 17;12:RP90184. doi: 10.7554/eLife.90184 (PMC10945579; doi:10.7554/eLife.90184)
Supplement: Figure 3—source data 8. [file elife-90184-fig3-data8.xlsx]

## Sheet: Sheet1
		Vector	Spastin	Spastin+Ubi	Spastin	Spastin(S233A)	Spastin(S233D)
		40.5374	2.13343	14.7553	4.151	15.2961	2.39129
		33.3024	3.641	23.4651	4.63138	16.9906	5.28287
		39.3337	2.16293	20.0631	3.74867	23.4118	1.6378
