# Supplementary material for: 14-3-3 protein augments the protein stability of phosphorylated spastin and promotes the recovery of spinal cord injury through its agonist intervention
Source: eLife. 2024 Jan 17;12:RP90184. doi: 10.7554/eLife.90184 (PMC10945579; doi:10.7554/eLife.90184)
Supplement: Figure 4—source data 2. [file elife-90184-fig4-data2.xls]

## Sheet: Sheet1
	Length of primary neurites										Number of primary neurites
	GFP	GFP+Glutamate	FC-A	Spastazoline	FC-A+Spastazoline	R18	Spastin	R18+Spastin			GFP	GFP+Glutamate	FC-A	Spastazoline	FC-A+Spastazoline	R18	Spastin	R18+Spastin		Length of primary neurites
	413.728	215.165	1414.37	293.632	779.598	42.0711	2141.42	951.588			5	2	6	4	5	1	12	9		GFP	GFP+Glutamate	FC-A	Spastazoline	FC-A+Spastazoline	R18	Spastin	R18+Spastin
	392.618	315.148	2486.78	277.999	642.271	189.362	2563.16	888.451			4	2	7	3	3	3	19	8		912.716	301.085	1502.93	146.569	599.437	147.684	1969.14	1060.89
	714.507	514.507	2318.56	32.4787	767.287	173.184	2131.18	937.296			4	3	5	1	7	3	15	5		1128.35	487.518	1634.73	113.747	627.906	53.4283	2069.43	969.794
	1797.88	154.139	1270.89	34.4142	369.695	291.252	1213.05	1973.53			8	5	6	1	3	4	10	7		927.476	545.092	1651.33	231.001	570.954	149.129	2216.4	1243.19
	1771.41	211.388	229.545	39.8284	587.837	29.8284	1841.43	1119.88			6	2	8	1	6	2	8	6
	787.969	186.342	1661.92	54	585.928	219.466	2346.53	814.604			4	3	10	2	4	2	12	7
	510.902	510.902	1138.4	293.632	463.443	88.6208	1547.17	740.876			3	5	7	8	5	1	9	4		Length of secondary neurites
	1851.87	751.164	1909.42	67.7477	817.326	55.8482	1944.14	1156.71			5	7	10	3	5	3	12	6		318.398	73.2896	1113.08	36.7616	342.367	63.7951	985.525	295.117
	370.461	370.461	1517.06	81.1356	630.203	33	1843.2	922.75			7	4	8	5	11	3	13	9		391.917	118.691	881.102	67.1079	334.973	80.809	1126.3	332.357
	892.58	264.165	1840.21	80.6569	546.089	25	1673.16	790.054			5	3	18	2	8	1	15	6		466.703	106.959	953.077	74.2526	370.597	87.6374	1188.37	297.484
	850.274	234.872	1009.2	127.799	329.704	32.4787	2463.47	765.756			6	5	5	2	7	1	22	9
	1780.57	780.249	2441.21	277.999	486.612	134.414	1946.47	848.769			7	7	13	1	7	2	15	8		Length of total neurites
	1024.33	524.194	1091.3	47.1421	957.503	39.8284	2546.13	1334.73			7	6	5	1	4	3	19	11		1541.61	365.786	2098.95	171.819	980.978	212.964	2696.41	1781.05
	865.844	865.844	1282.42	303.805	567.433	54	3164.16	1123.36			4	6	5	9	7	2	15	7		1425.6	559.293	2585.04	192.462	957.203	259.746	2814.46	1417.12
	667.077	667.077	1185.02	81.2624	548.142	293.632	1654.16	1079.43			6	4	8	2	4	6	15	7		1394.18	652.052	2783.6	485.253	1074.88	236.766	3404.78	1540.68
	1640.42	196.198	1564.98	409.452	997.787	67.7477	1913.15	1526.8			10	3	7	4	6	3	13	9
	676.255	676.255	2280.35	226.106	336.366	181.136	2134.13				4	8	15	3	4	5	15
	895.824	541.167	1997.41	134.378	639.633						5	5	8	1	5
	819.432	324.012	1597.79		336.366						6	3	8		8					Number of primary neurites
			2045.01		639.633								7		5					4.85714	3.14286	7	2.85714	4.71429	2.28571	12.1429	6.57143
					548.142								12		4					6.16667	5.33333	9.83333	2.33333	7	2.16667	16	8.16667
																				5.83333	4.83333	8.75	3.8	5.375	4	14.5	7.66667
																				Number of secondary neurites
	Length of secondary neurites																			3.83333	2.33333	11.5	1.5	5.33333	1.66667	16.5	8.83333
	GFP	GFP+Glutamate	FC-A	Spastazoline	FC-A+Spastazoline	R18	Spastin	R18+Spastin			Number of secondary neurites									4.57143	4	13.2857	3.57143	5.71429	3.85714	18.1429	4.42857
	89.4142	89.4142	735.803	55.8482	346.004	83.2426	1516.16	165.947			GFP	GFP+Glutamate	FC-A	Spastazoline	FC-A+Spastazoline	R18	Spastin	R18+Spastin		5.5	4.14286	11.1667	3.83333	7.5	3.6	20.75	6.5
	93.6569	93.6569	770.13	33	372.485	81.2426	1263.19	309.891			2	3	6	1	9	1	23	4		Number of total neurites
	298.54	64.1492	796.826	25	474.439	92.4045	942.161	137.374			4	2	11	1	1	1	17	8		9	5.2	17	3.6	8.2	4.4	30.6	17.2
	304.093	40.1643	1644.79	32.4787	318.77	16.1623	1324.13	553.601			5	2	12	1	8	3	18	9		10.125	8.75	24	6.25	9.5	5.5	30	11.5
	532.225	131.198	827.058	34.4142	446.503	66.0711	546.161	367.678			4	1	10	3	4	1	22	15		11.3333	9.16667	19.875	8.2	9.125	6.5	35.5	14
	592.46	21.1547	1903.89	39.8284	96	43.6476	321.346	236.213			3	4	7	2	8	3	14	16
	483.173	49.1941	785.769	54	319.534	61.2624	881.344	189.657			5	2	23	1	2	1	5	1
	320.534	51.1644	717.475	33	325.1	43.8995	1291.26	710.383			5	6	14	1	6	2	16	3
	66.505	66.505	882.51	67.7477	444.546	98.5914	1025.65	352.287			6	4	14	2	6	1	21	4
	672.219	137.42	1592.33	81.1356	328.964	47.1421	846.635	136.314			2	1	7	3	14	5	17	4
	514.916	164.191	974.644	80.6569	314.657	92.9574	1325.31	526.999			4	5	23	5	3	1	15	3
	238.142	216.169	594.515	127.799	329.314	121.539	957.366	192.485			6	4	17	9	2	4	20	7
	447.935	146.194	620.476	25.4164	282.699	100.271	1556.52	218.375			4	5	6	4	3	6	18	3
	201.792	102.195	1208.93	47.1421	315.177	169.353	1963.02	362.385			5	3	12	1	6	8	20	7
	982.642	12.1935	481.999	62.9574	523.489	94.9706	559.165	183.213			3	3	20	1	4	4	26	9
	195.75	156.35	800.947	91.5391	420.919	32.8284	983.155	346.854			8	5	5	6	10	3	14	3
	401.783	113.194	1308.05	100.271	146.743	53.3974	1248.16				4	3	11	8	11	1	17	7
	113.657	213.655	981.444	69.3532	470.511						5	4	11	3	6	2	26
	904.594	44.1687	937.095		346.743						3	8	9	4	8
			883.249		470.511						10	3	11		6
			812.195		371.632								27		8
													5		15
	Length of total neurites
	GFP	GFP+Glutamate	FC-A	Spastazoline	FC-A+Spastazoline	R18	Spastin	R18+Spastin			Number of total neurites
	1503.14	304.58	2150.17	349.48	425.603	125.314	3657.59	1617.54			GFP	GFP+Glutamate	FC-A	Spastazoline	FC-A+Spastazoline	R18	Spastin	R18+Spastin
	1486.27	408.805	2256.91	310.999	1314.76	270.605	2826.35	1898.34			7	5	19	5	11	2	35	13
	1013.05	578.656	2115.39	57.4787	1241.73	265.588	3073.35	2274.67			8	4	18	4	4	4	31	16
	1801.97	194.304	2915.69	66.8929	788.465	307.415	2537.19	1227.13			9	5	17	2	9	6	33	14
	1903.63	342.586	1056.6	74.2426	1134.34	95.8995	1387.6	1887.55			12	6	16	4	7	5	32	21
	1380.43	207.497	3565.81	93.8284	681.928	263.113	667.881	1050.82			9	6	15	3	10	5	22	22
	994.075	560.097	1924.17	347.632	682.977	149.883	2428.51	1330.53			9	5	33	3	6	3	7	8
	2172.41	802.328	2626.9	100.748	1142.43	99.7477	3235.39	1867.09			8	11	21	9	11	3	25	7
	436.966	436.966	2399.57	148.883	974.749	231.591	2868.85	1275.04			11	11	24	5	11	4	33	10
	1564.8	401.585	3432.54	161.792	1075.05	72.1421	2519.8	1926.37			9	5	15	8	8	8	30	13
	1365.19	399.063	1983.85	208.456	944.361	395.436	3788.78	1292.75			9	8	41	7	11	2	30	9
	2018.71	996.419	3035.73	405.798	915.925	725.953	2903.83	1041.25			12	9	22	11	9	5	33	16
	1472.26	670.389	1711.78	72.5586	1240.2	140.1	4102.66	1553.11			11	12	19	5	10	8	43	11
	1067.64	968.039	2491.35	350.947	1182.61	223.353	5127.18	1485.75			12	9	17	2	10	11	39	18
	1649.72	679.27	1667.02	444.22	871.632	388.603	2213.33	1262.64			7	9	25	10	9	6	37	16
	1836.17	352.548	2365.92	1000.99	1418.71	100.576	2896.31	1873.65			14	9	13	8	8	9	29	10
	1078.04	789.449	3761.8	326.377	983.109	234.533	3382.29				14	6	18	12	11	4	40	16
	1009.48	754.822	2934.5	303.731	1110.14						9	12	26	6	9	7	36
	1724.03	368.181	3481.04		883.109						8	13	17	5	8
			2857.2		1110.14						16	6	19		9
					1619.77								24		7
													17		12
