# Supplementary material for: 14-3-3 protein augments the protein stability of phosphorylated spastin and promotes the recovery of spinal cord injury through its agonist intervention
Source: eLife. 2024 Jan 17;12:RP90184. doi: 10.7554/eLife.90184 (PMC10945579; doi:10.7554/eLife.90184)
Supplement: Figure 4—source data 3. [file elife-90184-fig4-data3.xls]

## Sheet: Sheet1
	Control	FC-A	Spastazoline	FC-A+Spastazoline
	1	2.43616	0.275768	0.4566
	1	2.18635	0.171901	0.322347
	1	2.22671	0.303086	0.449414
	1	1.16351	0.346311	0.307702
	1	2.03422	0.0651858	0.181572
	1	2.23432	0.073588	0.200288
	1	2.46161	0.134848	0.181148
	1	2.59043	0.0983211	0.194886
	1	2.21048	0.0637697	0.0935646
	1	2.7112	0.154809	0.165481
	1	2.1556	0.17075	0.238758
	1	2.24756	0.175716	0.302252
	1	2.29148	0.223978	0.419031
	1	3.36705	0.191166	0.313639
