# Supplementary material for: 14-3-3 protein augments the protein stability of phosphorylated spastin and promotes the recovery of spinal cord injury through its agonist intervention
Source: eLife. 2024 Jan 17;12:RP90184. doi: 10.7554/eLife.90184 (PMC10945579; doi:10.7554/eLife.90184)
Supplement: Figure 5—source data 4. [file elife-90184-fig5-data4.xlsx]

## Sheet: Sheet1
	E							F							G
	14-3-3 protein levels after SCI							Spastin protein levels after SCI							Spastin protein levels in mice treated with FC-A after SCI
	Sham	1	3	7	14	30		Sham	1	3	7	14	30		Sham	1	3	7	14	30
	1	0.845015	1.57922	1.73938	0.998431	1.59217		1	0.17778	0.254056	0.641497	0	1.27754		1	0.184313	1.14933	2.02846	0.111823	1.30973
	1	0.89324	1.34579	1.4157	1.13338	1.34349		1	0.0752708	0.302523	0.721128	0	1.32355		1	0.209326	0.922877	1.86383	0.192333	1.484
	1	0.867804	1.36709	1.53009	1.11657	1.28076		1	0.0829533	0.270233	0.542145	0	1.12579		1	0.168914	1.06486	1.7099	0.0935783	1.5623
	H								I
	DPI	14-3-3			Spastin				DPI	Control			FC-A
	1	0.845015	0.89324	0.867804	0.17778	0.0752708	0.0829533		1	0.17778	0.0752708	0.0829533	0.184313	0.209326	0.168914
	3	1.57922	1.34579	1.36709	0.254056	0.302523	0.270233		3	0.254056	0.302523	0.270233	1.14933	0.922877	1.06486
	7	1.73938	1.4157	1.53009	0.641497	0.721128	0.542145		7	0.641497	0.721128	0.542145	2.02846	1.86383	1.7099
	14	0.998431	1.13338	1.11657	0	0	0		14	0	0	0	0.111823	0.192333	0.0935783
	30	1.59217	1.34349	1.28076	1.27754	1.32355	1.12579		30	1.27754	1.32355	1.12579	1.30973	1.484	1.5623
