# Supplementary material for: 14-3-3 protein augments the protein stability of phosphorylated spastin and promotes the recovery of spinal cord injury through its agonist intervention
Source: eLife. 2024 Jan 17;12:RP90184. doi: 10.7554/eLife.90184 (PMC10945579; doi:10.7554/eLife.90184)
Supplement: Figure 5—source data 5. [file elife-90184-fig5-data5.xlsx]

## Sheet: Sheet1
	Injury	FC-A	Spastazoline	FC-A+Spastazoline
	1	0.183544	1.48101	0.93038
	1	0.310127	1.81013	1.06329
	1	0.120253	1.62658	1.03165
