# Supplementary material for: 14-3-3 protein augments the protein stability of phosphorylated spastin and promotes the recovery of spinal cord injury through its agonist intervention
Source: eLife. 2024 Jan 17;12:RP90184. doi: 10.7554/eLife.90184 (PMC10945579; doi:10.7554/eLife.90184)
Supplement: Figure 5—source data 6. [file elife-90184-fig5-data6.xlsx]

## Sheet: Sheet1
														Ace/tubulin
		NF
													Injury	FC-A	Spastazoline	FC-A+Spastazoline
			Injury	FC-A	Spastazoline	FC-A+Spastazoline							12.709	6.292	33.513	30.001
			6.615	25.706	0.517	6.368							8.78	5.188	28.388	25.157										脱髓鞘面积
			8.411	26.398	1.467	7.824							13.206	7.116	21.117	18.176
			6.328	26.398	1.205	7.344							11.473	8.231	24.199	23.633
			6.925	26.398	2.145	6.346							20.534	4.537	27.992	21.043
			6.843	30.852	0.394	8.346
		Normalized	1	3.88602	0.0781557	0.962661
			1	3.13851	0.174414	0.93021							1	0.495082	2.63695	2.36061
			1	4.17162	0.190424	1.16056							1	0.590888	3.23326	2.86526
			1	3.81199	0.309747	0.91639							1	0.538846	1.59905	1.37634
			1	4.50855	0.0575771	1.21964							1	0.717424	2.10921	2.05988
													1	0.220951	1.3632	1.02479
	5-HT
	Injury	FC-A	Spastazoline	FC-A+Spastazoline
	16.716	30.04	2.621	8.255
	16.193	26.232	2.027	9.664
	14.766	27.84	0.717	8.017
	15.948	24.255	1.359	7.101
	16.329	26.143	0.214	9.942
		22.587		7.369
	1	1.79708	0.156796	0.493838
	1	1.61996	0.125178	0.596801
	1	1.88541	0.0485575	0.542936
	1	1.52088	0.0852144	0.44526
	1	1.60102	0.0131055	0.608855
