# Supplementary material for: 14-3-3 protein augments the protein stability of phosphorylated spastin and promotes the recovery of spinal cord injury through its agonist intervention
Source: eLife. 2024 Jan 17;12:RP90184. doi: 10.7554/eLife.90184 (PMC10945579; doi:10.7554/eLife.90184)
Supplement: Figure 6—source data 1. [file elife-90184-fig6-data1.xls]

## Sheet: Sheet1
																Max contact area									Normalized
	Regularity index							Normalized									Sham	Injury	FC-A	Spastazoline	FC-A+Spastazoline				Sham	Injury	FC-A	Spastazoline	FC-A+Spastazoline
	Sham	Injury	FC-A	Spastazoline	FC-A+Spastazoline											1	25.2	1.83	13.83	2.51	3.74			1	1	0.072619	0.54881	0.0996032	0.148413
1	92.31	0	73.33	0	0		1	1	0	0.794388	0	0				2	19.48	1.28	17.14	2.46	0			2	1	0.0657084	0.879877	0.126283	0
2	90.91	33.33	69.57	0	30.77		2	1	0.366626	0.765262	0	0.338467				3	25.11	1.77	12.74	1.31	1.55			3	1	0.0704898	0.507368	0.0521705	0.0617284
3	100	0	55.17	0	0		3	1	0	0.5517	0	0				4	29.33	0.91	16.21	2.57	5.93			4	1	0.0310263	0.552676	0.0876236	0.202182
4	100	33.33	58	33.33	0		4	1	0.3333	0.58	0.3333	0				5	21.57	2.74	15.05	1.22	3.89			5	1	0.127028	0.697728	0.05656	0.180343
5	95.71	0	88.89	0	33.33		5	1	0	0.928743	0	0.348239
	Stride length							Normalized
	Sham	Injury	FC-A	Spastazoline	FC-A+Spastazoline			Sham	Injury	FC-A	Spastazoline	FC-A+Spastazoline
	0.48	0.098	0.314	0.088	0.137		1	1	0.204167	0.654167	0.183333	0.285417
	0.507	0.1	0.39	0.11	0.087		2	1	0.197239	0.769231	0.216963	0.171598
	0.477	0.041	0.37	0.143	0.118		3	1	0.0859539	0.775681	0.29979	0.247379
	0.501	0.047	0.32	0.073	0.051		4	1	0.0938124	0.638723	0.145709	0.101796
	0.584	0.076	0.377	0.099	0.134		5	1	0.130137	0.645548	0.169521	0.229452
	Amptitude
	Sham	Injury	FC-A	Spastazoline	FC-A+Spastazoline
1	1125.63	26.88	642.19	65	181.25
2	828.13	34.38	759.38	54.38	178.13
3	937.5	41.25	426.56	56.88	162.5
4	890.63	37.5	567.19	84.38	156.25
5	1171.88	33.75	493.75	68.75	165.63
		BMS Score
	DPI(d)	sham	1	3	5	7	14	21	28	35	42		Injury	1	3	5	7	14	21	28	35	42		FC-A	1	3	5	7	14	21	28	35	42
		1	8	9	9	9	9	9	9	9	9		1	0	0	0	0	0	1	1	2	2		1	0	1	3	4	5	5	6	7	7
		2	9	9	9	9	9	9	9	9	9		2	0	0	0	0	1	1	1	1	1		2	0	1	1	3	4	5	5	6	6
		3	8	9	9	9	9	9	9	9	9		3	0	0	0	0	0	1	1	2	2		3	0	1	1	2	2	4	4	5	5
		4	9	9	9	9	9	9	9	9	9		4	0	0	0	0	1	2	2	2	2		4	0	1	1	2	2	3	4	5	5
		5	9	9	9	9	9	9	9	9	9		5	0	0	0	0	1	1	2	2	2		5	0	1	2	4	4	5	5	6	6
		Spastazoline	1	3	5	7	14	21	28	35	42		FC-A+Spastazoline	1	3	5	7	14	21	28	35	42
		1	0	0	0	0	0	1	1	1	1		1	0	0	0	1	1	1	1	1	2
		2	0	0	0	0	0	0	0	0	1		2	0	0	0	1	1	1	1	1	1
		3	0	0	0	1	1	2	2	2	2		3	0	0	0	0	1	1	2	2	2
		4	0	0	0	0	1	1	1	1	2		4	0	0	0	1	2	2	2	2	2
		5	0	0	0	0	1	2	2	2	2		5	0	0	0	0	1	1	1	1	2
