# Supplementary material for: 14-3-3 protein augments the protein stability of phosphorylated spastin and promotes the recovery of spinal cord injury through its agonist intervention
Source: eLife. 2024 Jan 17;12:RP90184. doi: 10.7554/eLife.90184 (PMC10945579; doi:10.7554/eLife.90184)
Supplement: Figure 7—source data 2. [file elife-90184-fig7-data2.xlsx]

## Sheet: Sheet1
	Sham	Injury	FC	spastazoline	FC+spastazoline
	1	1.20383	2.35233	0.516216	0.595613
	1	1.3456	2.13987	0.379979	0.265441
	1	1.35539	2.34938	0.402445	0.291852
	1	1.40141	2.05073	0.304511	0.37593
