# Supplementary material for: 14-3-3 protein augments the protein stability of phosphorylated spastin and promotes the recovery of spinal cord injury through its agonist intervention
Source: eLife. 2024 Jan 17;12:RP90184. doi: 10.7554/eLife.90184 (PMC10945579; doi:10.7554/eLife.90184)
Supplement: Figure 7—source data 3. [file elife-90184-fig7-data3.xlsx]

## Sheet: Sheet1
Sham	Injury	FC	Spastazoline	FC+Spastazoline
1	0.478934	1.74862	0.133669	0.345451
1	0.385619	0.947108	0.0880399	0.396773
1	0.300417	1.24127	0.44789	0.322824
1	0.4496	1.26654	0.179911	0.234133
1	0.104311	1.32951	0.27555	0.2858
