# Supplementary material for: 14-3-3 protein augments the protein stability of phosphorylated spastin and promotes the recovery of spinal cord injury through its agonist intervention
Source: eLife. 2024 Jan 17;12:RP90184. doi: 10.7554/eLife.90184 (PMC10945579; doi:10.7554/eLife.90184)
Supplement: Figure 7—source data 4. [file elife-90184-fig7-data4.xlsx]

## Sheet: Sheet1
	Time	Sham						Injury						FC-A						Spastazoline						FC-A+Spastazoline
	0	9	9	8	9	9		9	9	8	8	9		8	9	9	8			9	7	9	8	9		8	9	9	9	9
	1	9	8	9	9	9		0	0	0	0	0		0	0	0	0			0	0	0	0	0		0	0	0	0	0
	3	9	9	9	8	9		1	1	0	1	1		1	2	2	1			0	1	0	0	0		1	0	1	1	0
	7	9	9	9	9	9		2	3	2	1	2		5	4	4	4			1	1	0	2	1		1	3	3	1	1
	9	9	9	9	9	9		3	3	4	3	2		5	4	5	4			2	1	1	2	1		2	3	3	2	2
	14	9	9	9	9	9		4	4	5	4	4		6	6	6	5			2	2	2	2	1		3	4	3	4	3
	16	9	9	9	9	9		4	4	5	4	4		7	7	7	5			2	2	2	2	2		3	4	3	4	4
