# Supplementary material for: 14-3-3 protein augments the protein stability of phosphorylated spastin and promotes the recovery of spinal cord injury through its agonist intervention
Source: eLife. 2024 Jan 17;12:RP90184. doi: 10.7554/eLife.90184 (PMC10945579; doi:10.7554/eLife.90184)
Supplement: Figure 7—source data 5. [file elife-90184-fig7-data5.xlsx]

## Sheet: Sheet1
	Sham	Injury	FC-A	Spastazoline	FC-A+Spastazoline
	1	13.2635	4.18264	16.8021	11.641
	1	6.1557	3.7747	13.0802	11.6184
	1	10.2946	3.64344	16.7007	11.4295
	1	10.4632	6.76868	10.3142	8.56445
			3.57917	20.7785
