# Supplementary material for: 14-3-3 protein augments the protein stability of phosphorylated spastin and promotes the recovery of spinal cord injury through its agonist intervention
Source: eLife. 2024 Jan 17;12:RP90184. doi: 10.7554/eLife.90184 (PMC10945579; doi:10.7554/eLife.90184)
Supplement: Figure 7—source data 6. [file elife-90184-fig7-data6.xlsx]

## Sheet: Sheet1
		Control	Injury	FC-A	Spastazoline	FC-A+Spastazoline
		5.72801	2.53338	4.56222	1.0666	3.66559
		5.02294	2.64498	4.0482	1.20303	2.1673
		5.00422	2.43754	3.84112	1.44541	3.46974
		4.82986	2.13321	3.0915	1.02797	2.74657
		4.10345	1.91811	3.77101	1.89474	2.16489
