# Supplementary material for: 14-3-3 protein augments the protein stability of phosphorylated spastin and promotes the recovery of spinal cord injury through its agonist intervention
Source: eLife. 2024 Jan 17;12:RP90184. doi: 10.7554/eLife.90184 (PMC10945579; doi:10.7554/eLife.90184)
Supplement: Figure 7—source data 7. [file elife-90184-fig7-data7.xlsx]

## Sheet: Sheet1
		Control	Injury	FC-A	Spastazoline	FC-A+Spastazoline
		1.57683	1.64953	1.81636	1.7178	1.53549
		1.62443	1.75194	1.75194	1.45296	1.7389
		1.47419	1.7137	1.68122	1.57683	1.62779
		1.53562	1.81636	1.50786	1.81797	1.78848
		1.75495	1.61541	1.75495	1.67948	1.85936
